# Supplementary material for: Epidemiological characteristics of paediatric burn patients in China from 2016 to 2019: a retrospective study
Source: HighWire-hosted journal article supplement (doi:10.1136/bmjpo-2022-001796), 2023-05-01
Supplement: bmjpo-2022-001796supp001_data_supplement.pdf [file bmjpo-2022-001796supp001_data_supplement.pdf]

**The detailed classification of the complications in pediatric burn patients:**

- (1) Pneumonia: whooping cough, lung infection, mycoplasma pneumonia, community-acquired pneumonia, severe pneumonia.
- (2) Shock: hypovolemic shock, hemorrhagic shock, traumatic shock, septic shock, lightning shock, toxic shock.
- (3) Electrolyte disturbance: low sodium, high sodium, low potassium, high potassium, low chloride, high chlorine, low calcium, high calcium, metabolic acidosis, dehydration.
- (4) Septicopyemia: sepsis, bacteremia.
- (5) Cardiac diseases: myocardial damage, myocardial strain, heart failure.
- (6) Hypoproteinemia: albumin abnormality.
- (7) Intestinal infection: Diarrhea, enteritis, bacterial intestinal infection, rotavirus enteritis.
- (8) Convulsion: febrile convulsions, seizure.
- (9) Aspiration injury.
- (10) Alimentary tract hemorrhage; stress ulcer.
- (11) Liver diseases: abnormal liver function, liver insufficiency, liver injury, liver failure, hepatic coma.
- (12) Renal diseases: Renal insufficiency, renal failure, tubular necrosis.
- (13) Multiple organ dysfunction: multiple organ failure; multiple organ dysfunction syndrome.
- (14) Successful resuscitation from cardiac arrest.
- (15) Systemic inflammatory response syndrome.

**Sup Table 1** Gender distribution of pediatric burn patients in different age and cause of burn injuries groups.

|                               | N    | Male<br>(n, row percent) | Female<br>(n, row percent) | $\chi^2$ | P            |
|-------------------------------|------|--------------------------|----------------------------|----------|--------------|
| <b>Age</b>                    |      |                          |                            | 7.905    | <b>0.048</b> |
| <1 years old                  | 366  | 211, 57.65%              | 155, 42.35%                |          |              |
| 1-2 years old                 | 4715 | 2992, 63.46%             | 1723, 36.54%               |          |              |
| 3-5 years old                 | 1158 | 724, 62.52%              | 434, 37.48%                |          |              |
| 6-15 years old                | 502  | 335, 66.73%              | 167, 33.27%                |          |              |
| <b>Cause of burn injuries</b> |      |                          |                            | 14.544   | <b>0.013</b> |
| Hydrothermal scald            | 5431 | 3399, 62.59%             | 2032, 37.41%               |          |              |
| Flame                         | 206  | 137, 66.50%              | 69, 33.50%                 |          |              |
| Electric                      | 85   | 69, 81.18%               | 16, 18.82%                 |          |              |
| Chemical                      | 84   | 53, 63.10%               | 31, 36.90%                 |          |              |
| Others                        | 100  | 66, 66.00%               | 34, 34.00%                 |          |              |
| Unknown                       | 835  | 538, 64.43%              | 297, 35.57%                |          |              |

**Sup Table 2** Cause distribution of pediatric burn patients in different age groups.

|                               | N    | <1 years old<br>(n, column percent) | 1-2 years old<br>(n, column percent) | 3-5 years old<br>(n, column percent) | 6-15 years old<br>(n, column percent) | $\chi^2$ | P                |
|-------------------------------|------|-------------------------------------|--------------------------------------|--------------------------------------|---------------------------------------|----------|------------------|
| <b>Cause of burn injuries</b> |      |                                     |                                      |                                      |                                       | 665.049  | <b>&lt;0.001</b> |
| Hydrothermal scald            | 5431 | 254, 69.40%                         | 4019, 85.24%                         | 882, 76.17%                          | 276, 54.98%                           |          |                  |
| Flame                         | 206  | 8, 2.19%                            | 62, 1.31%                            | 46, 3.97%                            | 90, 17.93%                            |          |                  |
| Electric                      | 85   | 1, 0.27%                            | 31, 0.66%                            | 28, 2.42%                            | 25, 4.98%                             |          |                  |
| Chemical                      | 84   | 3, 0.82%                            | 49, 1.04%                            | 17, 1.47%                            | 15, 2.99%                             |          |                  |
| Others                        | 100  | 8, 2.19%                            | 55, 1.17%                            | 18, 1.55%                            | 19, 3.78%                             |          |                  |
| Unknown                       | 835  | 92, 25.14%                          | 499, 10.58%                          | 167, 14.42%                          | 77, 15.34%                            |          |                  |

**Sup Table 3** Age distribution of pediatric burn patients in different hospitalization

month.

| Month     | Total<br>(N, percent) | <1 years old | 1-2 years old | 3-5 years old | 6-15 years old |
|-----------|-----------------------|--------------|---------------|---------------|----------------|
| January   | 596, 8.84%            | 41           | 380           | 129           | 46             |
| February  | 522, 7.74%            | 15           | 315           | 128           | 64             |
| March     | 588, 8.72%            | 7            | 405           | 131           | 45             |
| April     | 589, 8.74%            | 8            | 441           | 108           | 32             |
| May       | 623, 9.24%            | 13           | 458           | 111           | 41             |
| June      | 602, 8.93%            | 11           | 458           | 94            | 39             |
| July      | 587, 8.71%            | 15           | 431           | 91            | 50             |
| August    | 560, 8.31%            | 26           | 403           | 79            | 52             |
| September | 541, 8.03%            | 26           | 408           | 75            | 32             |
| October   | 505, 7.49%            | 48           | 356           | 69            | 32             |
| November  | 488, 7.24%            | 71           | 320           | 68            | 29             |
| December  | 540, 8.01%            | 85           | 340           | 75            | 40             |

**Sup Table 4** Hospitalization season distribution of pediatric burn patients in different cause of burn injuries groups.

|                                        | N    | Hydrother<br>mal scald<br>(n, row<br>percent) | Flame<br>(n, row<br>percent) | Electric<br>(n, row<br>percent) | Chemica<br>l<br>(n, row<br>percent) | Others<br>(n, row<br>percent) | Unknow<br>n<br>(n, row<br>percent) | $\chi^2$ | P      |
|----------------------------------------|------|-----------------------------------------------|------------------------------|---------------------------------|-------------------------------------|-------------------------------|------------------------------------|----------|--------|
| <b>Hospital<br/>ization<br/>season</b> |      |                                               |                              |                                 |                                     |                               |                                    | 68.610   | <0.001 |
| Spring                                 | 1802 | 1461,<br>26.90%                               | 47,<br>22.82%                | 18,<br>21.28%                   | 21,<br>25.00%                       | 22,<br>22.00%                 | 233,<br>27.90%                     |          |        |
| Summer                                 | 1732 | 1333,<br>24.54%                               | 81,<br>39.32%                | 7,<br>8.24%                     | 26,<br>30.95%                       | 30,<br>30.00%                 | 240,<br>28.74%                     |          |        |
| Autumn                                 | 1490 | 1205,<br>22.19%                               | 35,<br>16.99%                | 22,<br>25.88%                   | 27,<br>32.14%                       | 23,<br>23.00%                 | 178,<br>21.32%                     |          |        |
| Winter                                 | 1717 | 1432,<br>26.37%                               | 43,<br>20.87%                | 38,<br>44.71%                   | 10,<br>11.90%                       | 25,<br>25.00%                 | 184,<br>22.04%                     |          |        |
